# Supplementary material
Source: Springer Nature journal article supplement (https://www.springermedizin.de/resource/supplementary/12958_2011_960_MOESM9_ESM.pdf/9566592)
Supplement: MOESM9 [file 9566592]

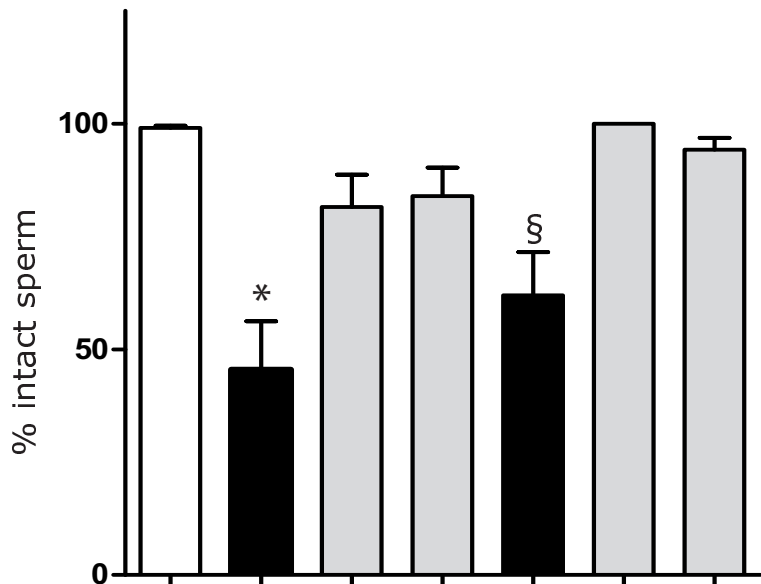

|                                |   |     |     |     |     |     |     |
|--------------------------------|---|-----|-----|-----|-----|-----|-----|
| Group                          | 8 | 9   | 10  | 11  | 12  | 13  | 14  |
| Temperature (°C)               | - | 37  | 37  | 37  | 35  | 35  | 35  |
| Number of treatments           | - | 2   | 2   | 1   | 2   | 2   | 2   |
| Duration (minutes)             | - | 15  | 10  | 10  | 15  | 15  | 10  |
| Coupling medium                | - | S   | S   | S/W | S   | W   | S   |
| Intensity (W/cm <sup>2</sup> ) | - | 2.2 | 2.2 | 2.2 | 2.2 | 2.2 | 2.0 |
| Animals                        | 2 | 7   | 4   | 5   | 8   | 4   | 4   |
| Epididymides                   | 4 | 13  | 8   | 5   | 16  | 8   | 8   |
